# Supplementary material for: Design and characterisation of casein coated and drug loaded magnetic nanoparticles for theranostic applications
Source: Royal Society of Chemistry journal article supplement (doi:10.1039/d4ra02626h), 2024-01-01
Supplement: d4ra02626h1.pdf [file d4ra02626h1.pdf]

## Supporting information: Design and Characterisation of casein coated and drug loaded magnetic nanoparticles for theranostic applications

Christina Wenck<sup>a†</sup>, Nils Meier<sup>a†</sup>, Eilien Heinrich<sup>a</sup>, Verena Grützner<sup>a</sup>, Frank Wiekhorst<sup>b</sup> and Regina Bleul<sup>a</sup>

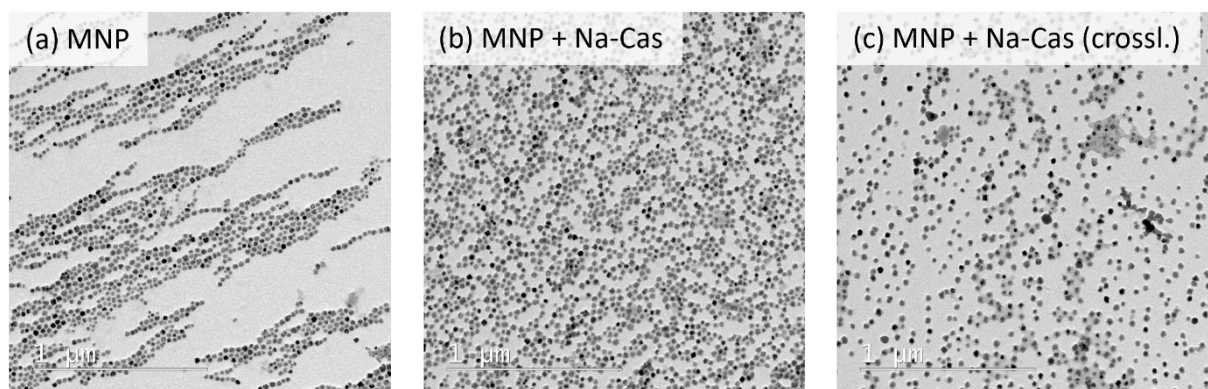

Figure 1: TEM pictures of (a) uncoated MNP, (b) MNP coated with Na-Cas and (c) MNP coated with Na-Cas enzymatically crosslinked. Scale bar 1 μm.

Table 1: Zeta potential of MNP, MNP+Na-Cas and MNP+Na-Cas (crossl.).

| Sample                 | Zeta Potential [mV] (pH ~6.7) |
|------------------------|-------------------------------|
| MNP                    | -53.87 ± 2.19                 |
| MNP + Na-Cas           | -36.71 ± 0.60                 |
| MNP + Na-Cas (crossl.) | -38.10 ± 4.62                 |

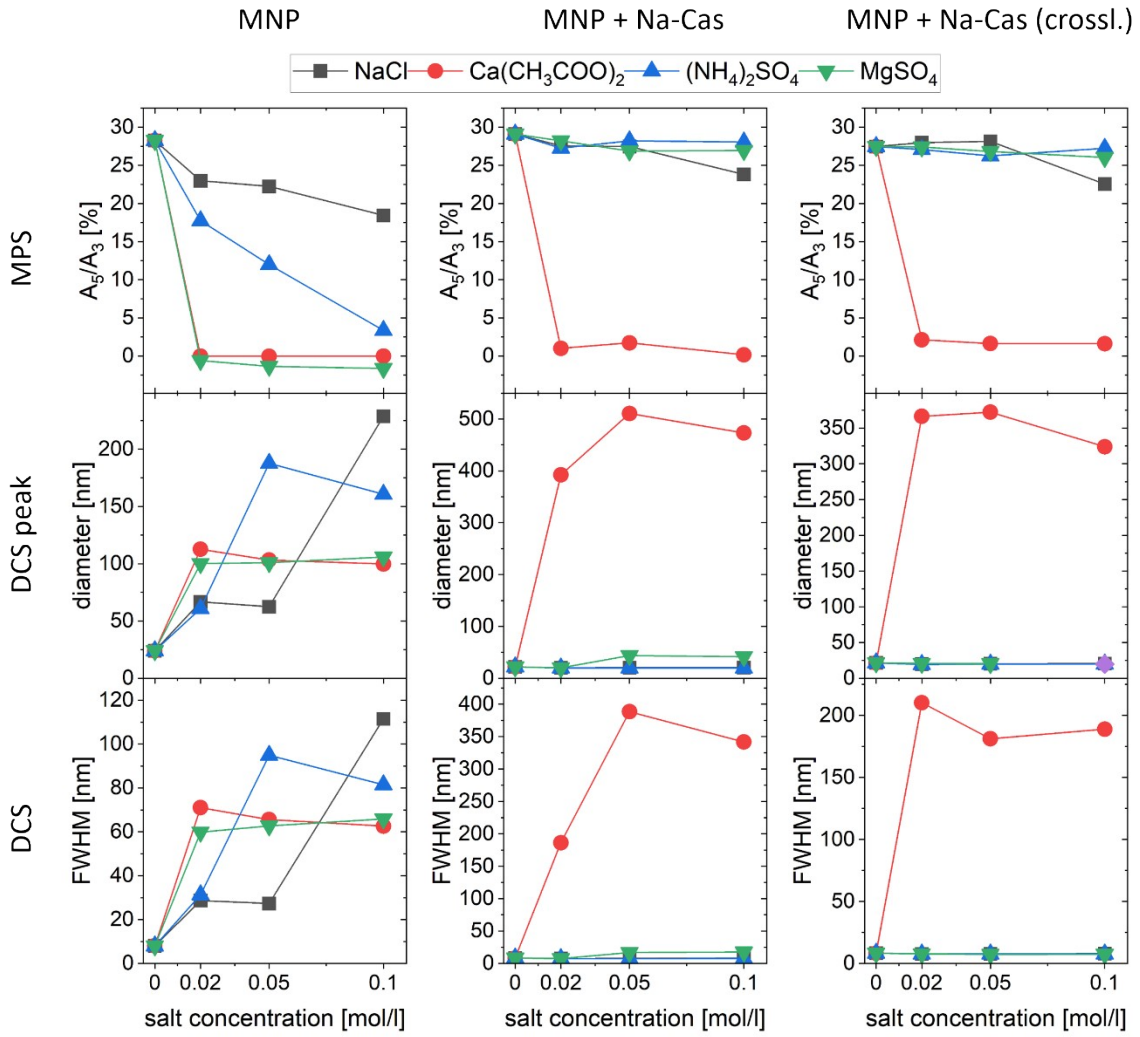

Figure 2:  $A_5/A_3$  measured with online MPS and diameter and FWHM measured by DCS of MNP, MNP+Na-Cas and MNP+Na-Cas (crossl.) as a function of added salt concentration of NaCl,  $Ca(CH_3COO)_2$ ,  $(NH_4)_2SO_4$  and  $MgSO_4$ . The MPS data and DCS diameter are already shown in main article, but for comparison with FWHM they are displayed again.

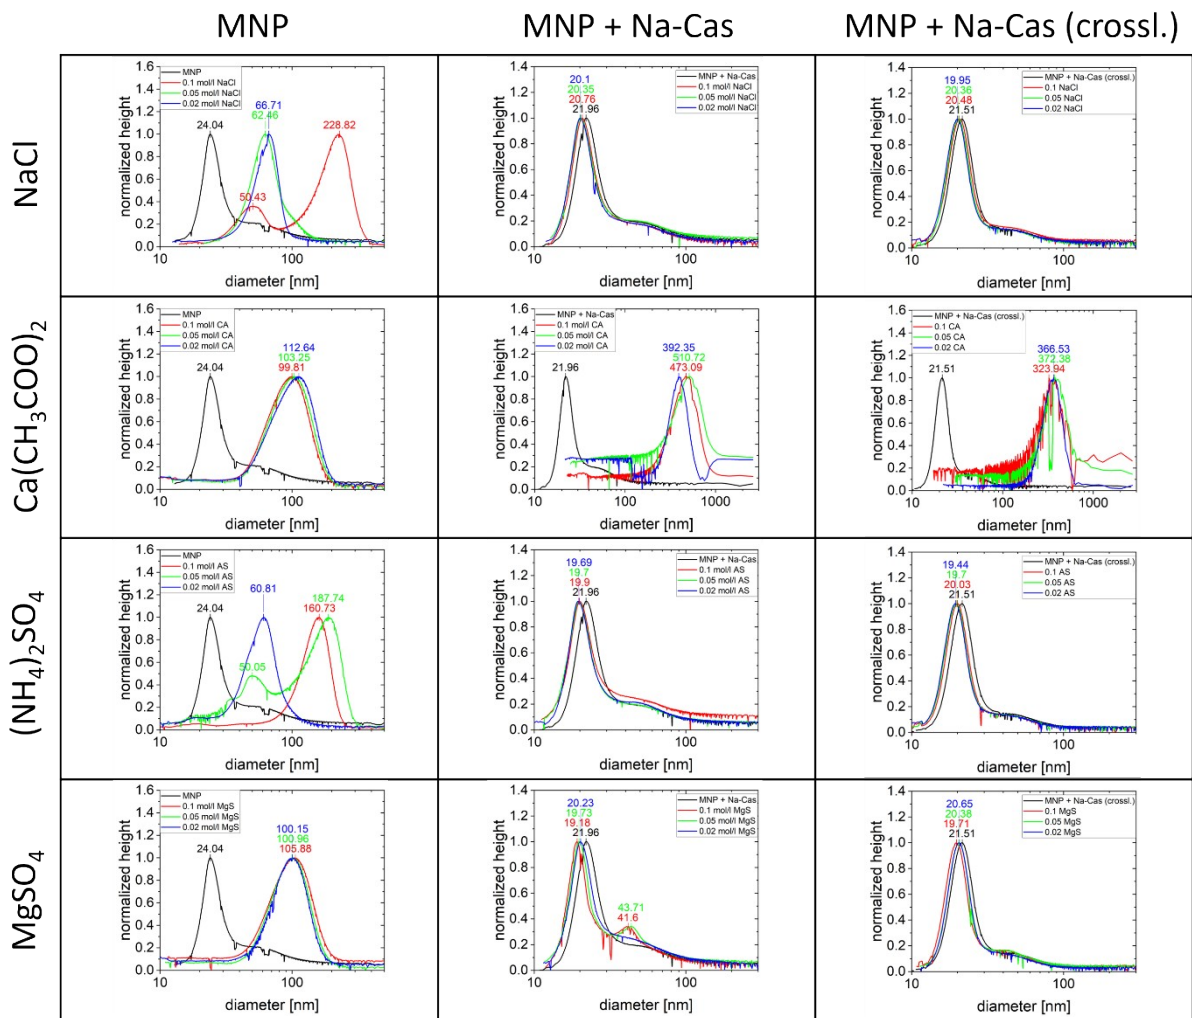

Figure 3: DCS measurements of MNP, MNP+Na-Cas and MNP+Na-Cas (crossl.) with salts NaCl, Ca(CH<sub>3</sub>COO)<sub>2</sub>, (NH<sub>4</sub>)<sub>2</sub>SO<sub>4</sub> and MgSO<sub>4</sub> at different concentrations: 0 mol/l (black), 0.1 mol/l (red), 0.05 mol/l (green) and 0.02 mol/l (blue).

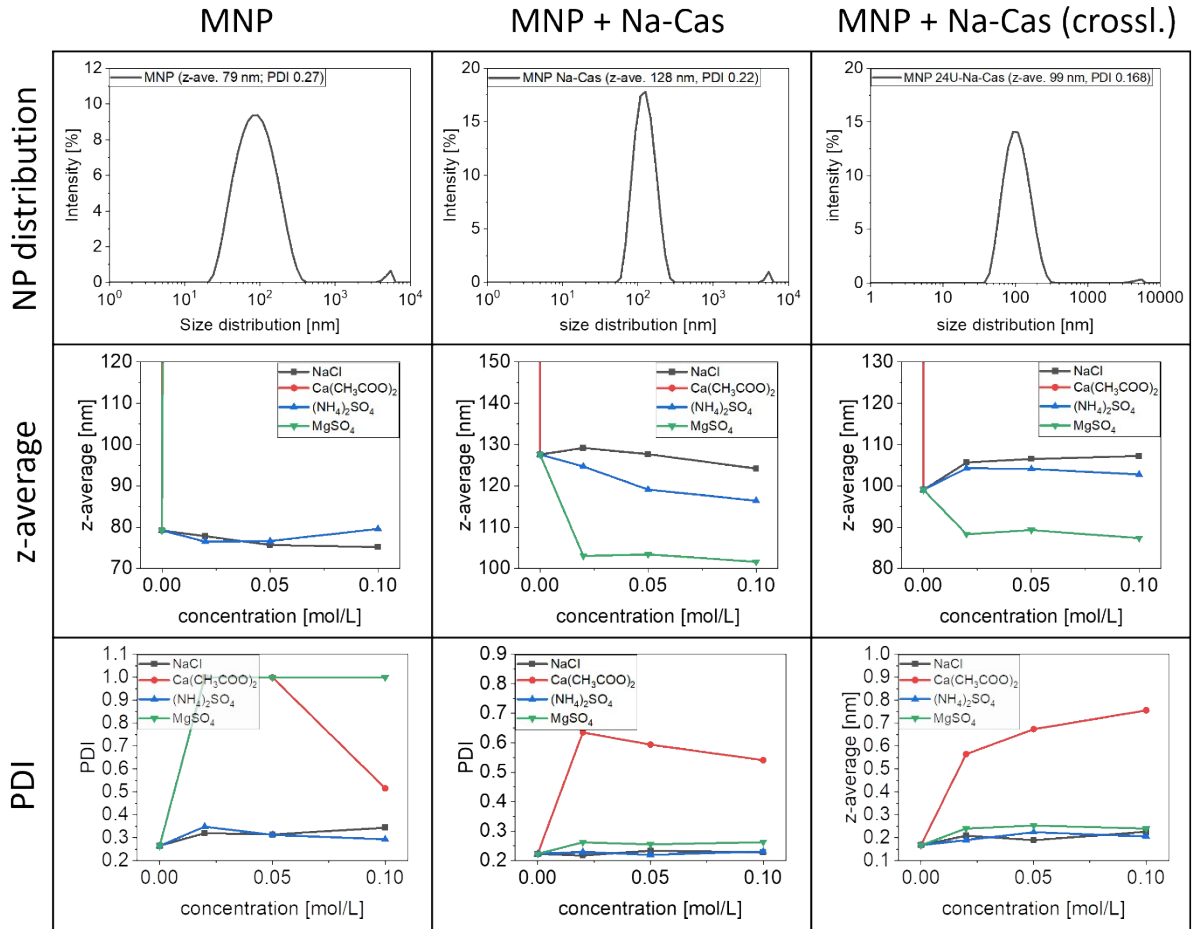

Figure 4: Z-average and PDI of MNP, MNP+Na-Cas and MNP+Na-Cas (crossl.) as a function of added salt concentration of NaCl,  $\text{Ca}(\text{CH}_3\text{COO})_2$ ,  $(\text{NH}_4)_2\text{SO}_4$  and  $\text{MgSO}_4$ .

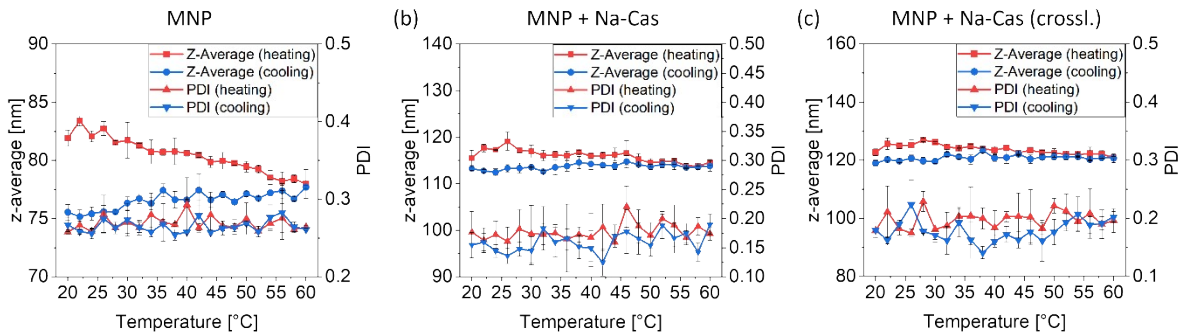

Figure 5: Z-average and PDI of MNP, MNP+Na-Cas and MNP+Na-Cas (crossl.) over a temperature change from 20 °C to 60 °C (heating) and back to 20 °C (cooling).

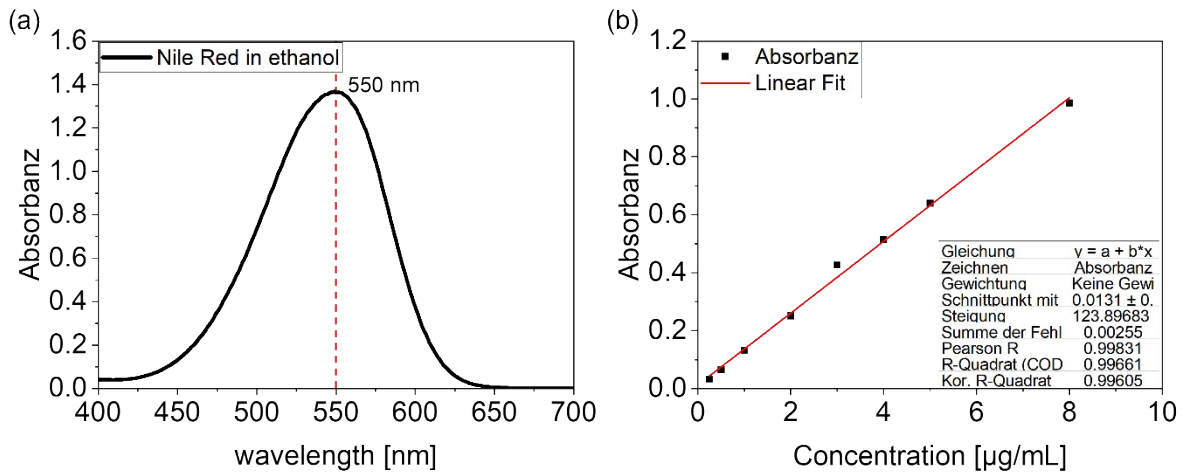

Figure 6 UV/Vis analysis of Nile Red, (a) Spectrum of Nile Red in ethanol and (b) linear calibration of Nile Red in ethanol for determination of encapsulation efficiency.

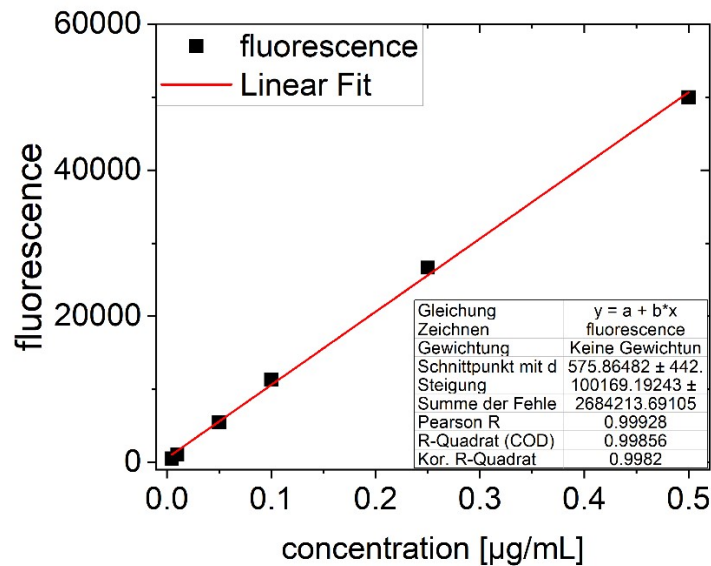

Figure 7: Fluorometric calibration curve of Nile Red in PBS (pH 7.4, 5% Polysorbate 80).

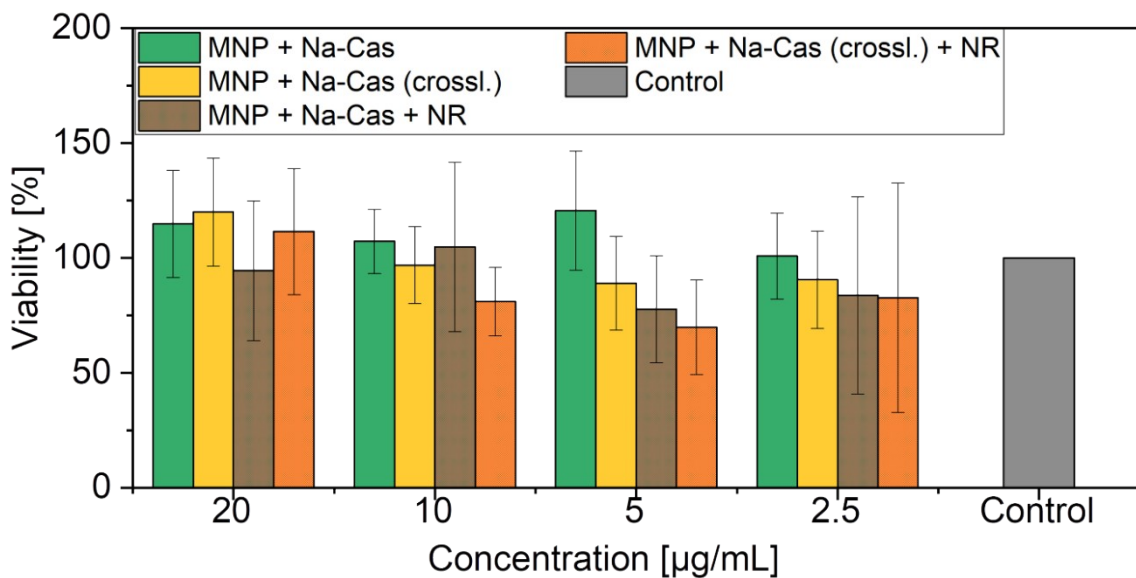

Figure 8 Viability of Squamous Cell Carcinoma (SCL-1) cells determined using a CCK-8 assay (450 nm) after 72 h of exposure to casein coated MNP (MNP+Na-Cas and MNP+Na-Cas (crossl.)) in different concentrations. Error bars represent standard deviations (n=3). NR stands for Nile Red.
